# Supplementary material for: ZNF423 patient variants, truncations, and in-frame deletions in mice define an allele-dependent range of midline brain abnormalities
Source: PLoS Genet. 2020 Sep 14;16(9):e1009017. doi: 10.1371/journal.pgen.1009017 (PMC7515201; doi:10.1371/journal.pgen.1009017)
Supplement: S1 Table — Cas9 editing formulations and frequency of recovered founders are given. (XLSX) [file pgen.1009017.s001.xlsx]

## Sheet: S1-injections
Job	JobDate	Target	Guide1	Guide2	HDR donor	cr-tracr annealing	cr-tracr_conc	Cas9_source	Cas9_conc	RNP_formation	ODN_conc	RS-1	Prep	Strain	Comment	Moms	LittersLost	LittersHeld	Pups	Results
1A	2017-06-08	P913L	TCACAACATCCGGCCCGGCG	-	ultramer P913L	50 µM in IDTE	0.6 µM	IDT protein	30 ng/µl	briefly, RT°	2.5 µM	-	fresh	FVB/NJ	successful	5	-	3	8	5 edited. #2,6,7,8 HDR edits (#6 hm); #1 indel [+2]. #4,5 plausible mosaic. #6 fd after wean.
1B	2017-06-08	H1277Y	GTGCGTGCTGGCTCATCGTG	-	ultramerPair	50 µM in IDTE	0.6 µM	IDT protein	30 ng/µl	briefly, RT°	2.5 µM total	-	fresh	FVB/NJ	repeated 7/20/17	6	-	2	9	1 edited. #9 het for H1277H control HDR only.
2A	2017-06-13	N507Tfs*43	CCAACAGGCGCATTGCAGTG	CACATTCGAGTCTCGCACTG	Megamer	50 µM in IDTE	1.2 µM	IDT protein	30 ng/µl	5' RT°	4 ng/µl	-	fresh	FVB/NJ	repeated 10/5/17	6	2	2	8	7/8 edited. #2 HDR - under-amplified. #2 ∆11. #3 ∆6. #4,6 mosaic for 2 secondary alleles. #7 wt.
3A	2017-06-22	G132V	TTGTGACCTCGGCCTCGGCG	-	ultramerPair 2:1	50 µM in IDTE	1.2 µM	mRNA (Core)	50 ng/µl	NA	2.4 µM total	-	fresh	FVB/NJ	repeated with Cas9 protein and new guide sequence 8/4/17	7	1	4	11	10 seq, all wt.
3B	2017-06-22	Q1008H	TCCGTAAGTCGGGGTGCATC	-	ultramerPair 2:1	50 µM in IDTE	1.2 µM	mRNA (Core)	50 ng/µl	NA	2.4 µM total	-	fresh	FVB/NJ	repeated with Cas9 protein 8/4/17	8	0	7	29	27 seq, all wt.
4A	2017-06-29	N1056Qfs*28	GCAGACTGTCACCTCGACGC	GGCCCGGAGTGCCAATGGAC	Megamer	50 µM in IDTE	1.2 µM	IDT protein	30 ng/µl	15' RT°	5 ng/µl	-	stored -80°C	FVB/NJ	successful	6	2	2	9	All edited. Several deletions. #8 MegaMer/∆210, #9 MegaMer/wt.
4B	2017-06-29	M995I	TGGCATTTTGCAGATGCGAC	-	ultramer M995I	50 µM in IDTE	1.2 µM	IDT protein	30 ng/µl	15' RT°	2.4 µM	-	stored -80°C	FVB/NJ	repeated 10/12/17	6	0	6	26	26 seq, all wt.
5B	2017-07-20	H1277Y	GTGCGTGCTGGCTCATCGTG	-	ultramer H1277Y	50 µM in IDTE	2.5 µM	IDT protein	40 ng/µl	15' RT°	3.2 µM	-	fresh	FVB/NJ	repeated 9/29/17	8	1	4	10	1 HDR fd. 9 wt.
6A	2017-08-04	G132V_2	TGACCTCGGCCTCGGCGAGG	-	ultramerPair 3:1	50 µM in 0.5x Duplex buffer	1.6 µM	IDT protein	32 ng/µl	20' RT°	3.2 µM total	-	fresh	FVB/NJ	successful	6	0	6	24	14 edited. #12,35 G132V/+. #18 G132V/ins6. #19 control edit. #34 ∆18/+
6B	2017-08-04	Q1008H_2	TCCGTAAGTCGGGGTGCATC	-	ultramerPair 2:1	40 µM in 0.2x Duplex buffer	1.3 µM	IDT protein	32 ng/µl	20' RT°	3.2 µM total	-	fresh	FVB/NJ	repeated 9/29/17	8	-	1	4	4 seq, all wt.
7A	2017-08-18	S382P	CGTGGACCCGCGCTCCACAG	-	ultramerPair 2:1	50 µM in 0.5x Duplex buffer	1.5 µM	IDT protein	30 ng/µl	RT°	3.2 µM total	-	fresh	FVB/NJ	successful	7?		2	7	4 edited. #3 S382P. #6 S382S. #2,4 indels
7B	2017-08-18	K1071/Y1064	TACGGAACTCTTTGAGGCAC	-	ultramerPool_3	40 µM in 0.2x Duplex buffer	1.2 µM	IDT protein	30 ng/µl	RT°	3.2 µM total	7.5 µM	fresh	FVB/NJ	successful	6?		2	7	4 edited. #2,5,7 Y1064C. #6 K1071Q.
8A	2017-08-24	A434S/E	CTGAGGTTTATCCGCGTGAA	-	ultramerPool_3	50 µM in 0.5x Duplex buffer	1.5 µM	IDT protein	30 ng/µl	RT°	3.2 µM total	-	stored -80°C	FVB/NJ	difficult to inject; repeated 10/5/17	8		1	5	4 edited, no HDR. #1,2,3 ins1. #5 ∆13
9A	2017-09-29	Q1008H_3	TCCGTAAGTCGGGGTGCATC	-	ultramerPair 2:1	25 µM in 0.5x Duplex buffer	1.2 µM	IDT protein	36 ng/µl	20' RT°	3.2 µM	7.5 µM	fresh	FVB/NJ	successful	8		3	10	10 edited, 3 HDR. #31, 32, 35 Q1008H.
9B	2017-09-29	H1277Y_3	GTGCGTGCTGGCTCATCGTG	-	ultramer H1277Y	25 µM in 0.5x Duplex buffer	1.2 µM	IDT protein	30 ng/µl	20' RT°	3.2 µM total	7.5 µM	fresh	FVB/NJ	successful	8	1	3	11	2 edited, 1 HDR. #21 H1277Y. #28 ∆91 (GGGAC micro-homology).
10A	2017-10-05	A434A/S/E	CTGAGGTTTATCCGCGTGAA	-	ultramerPool_3	50 µM in 0.5x Duplex buffer	1.5 µM	NEB EnGen	9.7 ng/µl	15' RT°	3.2 µM total	7.5 µM	fresh	FVB/NJ	partial	5	0	3	17	6 edited, 2 HDR. #12, 19 A434A control edits. 5 indels. 11 wt.
10B	2017-10-05	N507Tfs*42	CCAACAGGCGCATTGCAGTG	CACATTCGAGTCTCGCACTG	Megamer	25 µM in 0.5x Duplex buffer, separate reactions	2 x 0.75 µM	IDT HiFi	40 ng/µl	15' RT°	5 ng/µl	7.5 µM	fresh	FVB/NJ		6	1	2	7	4 edited, no HDR. 2 wt. #14 no amp.
11A	2017-10-12	R946Q	TCTTCTCGGAGAACGGGCTC	-	ultramerPair 3:1	50 µM in 0.5x Duplex buffer	1.5 µM	IDT HiFi	30 ng/µl	15' RT°	3.2 µM total	7.5 µM	stored -80°C	FVB/NJ	needle clogged, supt injected				18	18 seq, all wt.
11B	2017-10-12	M995I_2	TGGCATTTTGCAGATGCGAC	-	ultramer M995I	25 µM in 0.5x Duplex buffer	1.5 µM	IDT HiFi	30 ng/µl	15' RT°	3.2 µM	7.5 µM	stored -80°C	FVB/NJ	needle clogged, supt injected				17	8 edited, no clear HDR. #27, 38 indels. 7 wt.
12A	2017-10-19	T951M	CAGGGCCCCGGTGCGTCTGC	-	ultramerPair 4:1	50 µM in 0.5x Duplex buffer	1.5 µM	IDT HiFi	30 ng/µl	20' RT°	3.2 µM total	7.5 µM	fresh	FVB/NJ				2	12	5 edited, no HDR. ∆2, ∆6, ∆12
13A	2017-10-26	A434S/E	CTGAGGTTTATCCGCGTGAA	-	ultramerPool_3	50 µM in 0.5x Duplex buffer	1.5 µM	IDT HiFi	30 ng/µl	20' RT°	3.2 µM total	7.5 µM	fresh	FVB/NJ				1	3	2 edited, no HDR. 1 wt. #23,24 1 bp indels
13B	2017-10-26	H1277Y	GTGCGTGCTGGCTCATCGTG	-	ultramer H1277Y	25 µM in 0.5x Duplex buffer	1.5 µM	NEB EnGen	32 ng/µl	20' RT°	4 µM total	7.5 µM	fresh	FVB/NJ				1	7	3 edited, no HDR. 4 wt. #31 ∆2, #33 ∆1, #32 mosaic for 2 indels
14A	2018-02-06	P913L	TCACAACATCCGGCCCGGCG	-	ultramer P913L	40 µM in 0.2x Duplex buffer	1.5 µM	IDT HiFi	30 ng/µl	20' RT°	3.2 µM total	7.5 µM	fresh	B6/Envigo	successful				9	6 HDR
15A	2018-02-07	423 ∆ZF1	GTCCTGCTGACAGTGATCGC	ATTACCTCCAGGACAGCGGT	ultramer	50 µM in 0.5x Duplex buffer	2 x 1 µM	IDT HiFi	30 ng/µl	20' RT°	3.2 µM total	7.5 µM	fresh	B6/Envigo	successful				2	5 born, 2 survived. Dead pup sequenced wt.
15B	2018-02-07	423 ∆22-24	TCACAACATCCGGCCCGGCG	TCCGTAAGTCGGGGTGCATC	ultramer	40 µM in 0.2x Duplex buffer	2 x 1 µM	IDT HiFi	30 ng/µl	20' RT°	3.2 µM total	7.5 µM	fresh	B6/Envigo	no survivors			0	0	1 dead pup - sequence appears homozygous deletion
16A	2018-04-26	R89H	ATTACCTCCAGGACAGCGGT	-	ultramer	50 µM in 0.5x Duplex buffer	1.5 µM	IDT HiFi	30 ng/µl	25' RT°	3.2 µM total	-	fresh	FVB/NJ	HDR design error, discontinuous sequence			5	20	14 edited. 6 wt.
17A	2018-05-03	E1124K	TCGAACTTCACGTTACATTC	-	ultramer	50 µM in 0.5x Duplex buffer	1.5 µM	IDT HiFi	30 ng/µl	15' RT°	3.2 µM total	-	stored -80°C	FVB/NJ	successful			5	21
18B	2018-05-10	R760C	CAACTGGGACTTCCGCAAGG	-	ultramer	50 µM in 0.5x Duplex buffer	1.5 µM	IDT HiFi	30 ng/µl	20' RT°	3.2 µM total	-	fresh	FVB/NJ	possible formulation error; repeat successful			6	31	31/31 edited, several mosaic, no HDR
19A	2018-05-17	R760C	CAACTGGGACTTCCGCAAGG	-	ultramer	50 µM in 0.5x Duplex buffer	1.5 µM	IDT HiFi	30 ng/µl	20' RT°	3.2 µM total	-	fresh	FVB/NJ	successful			3	15	8/13 edited, 5 HDR, 6 indel
19B	2018-05-17	E675Q	CAAAGAGGACTTCGACTCTC	-	ultramer	50 µM in 0.5x Duplex buffer	1.5 µM	IDT HiFi	30 ng/µl	15' RT°	3.2 µM total	-	stored -80°C	FVB/NJ				1	5	3 edited, no HDR
21A	2018-06-28	R89Hv2	ATTACCTCCAGGACAGCGGT	-	ultramer (revised)	50 µM in 0.5x Duplex buffer	1.5 µM	IDT HiFi	30 ng/µl	20' RT°	3.2 µM total	-	fresh	FVB/NJ	successful			3	14	7 HDR, 5 indel
22A	2018-07-19	E675Q	CAAAGAGGACTTCGACTCTC	-	ultramer (revised)	50 µM in 0.5x Duplex buffer	1.5 µM	IDT HiFi	30 ng/µl	20' RT°	3.2 µM total	-	stored -80°C	FVB/NJ	clogged needle, Born CMME Vivarium					3 edited, no HDR. ∆18A, ∆18B, ∆5
